# Supplementary material for: Prediction of Ross River virus incidence in Queensland, Australia: building and comparing models
Source: PeerJ journal article supplement (doi:10.7717/peerj.14213), 2022-11-08

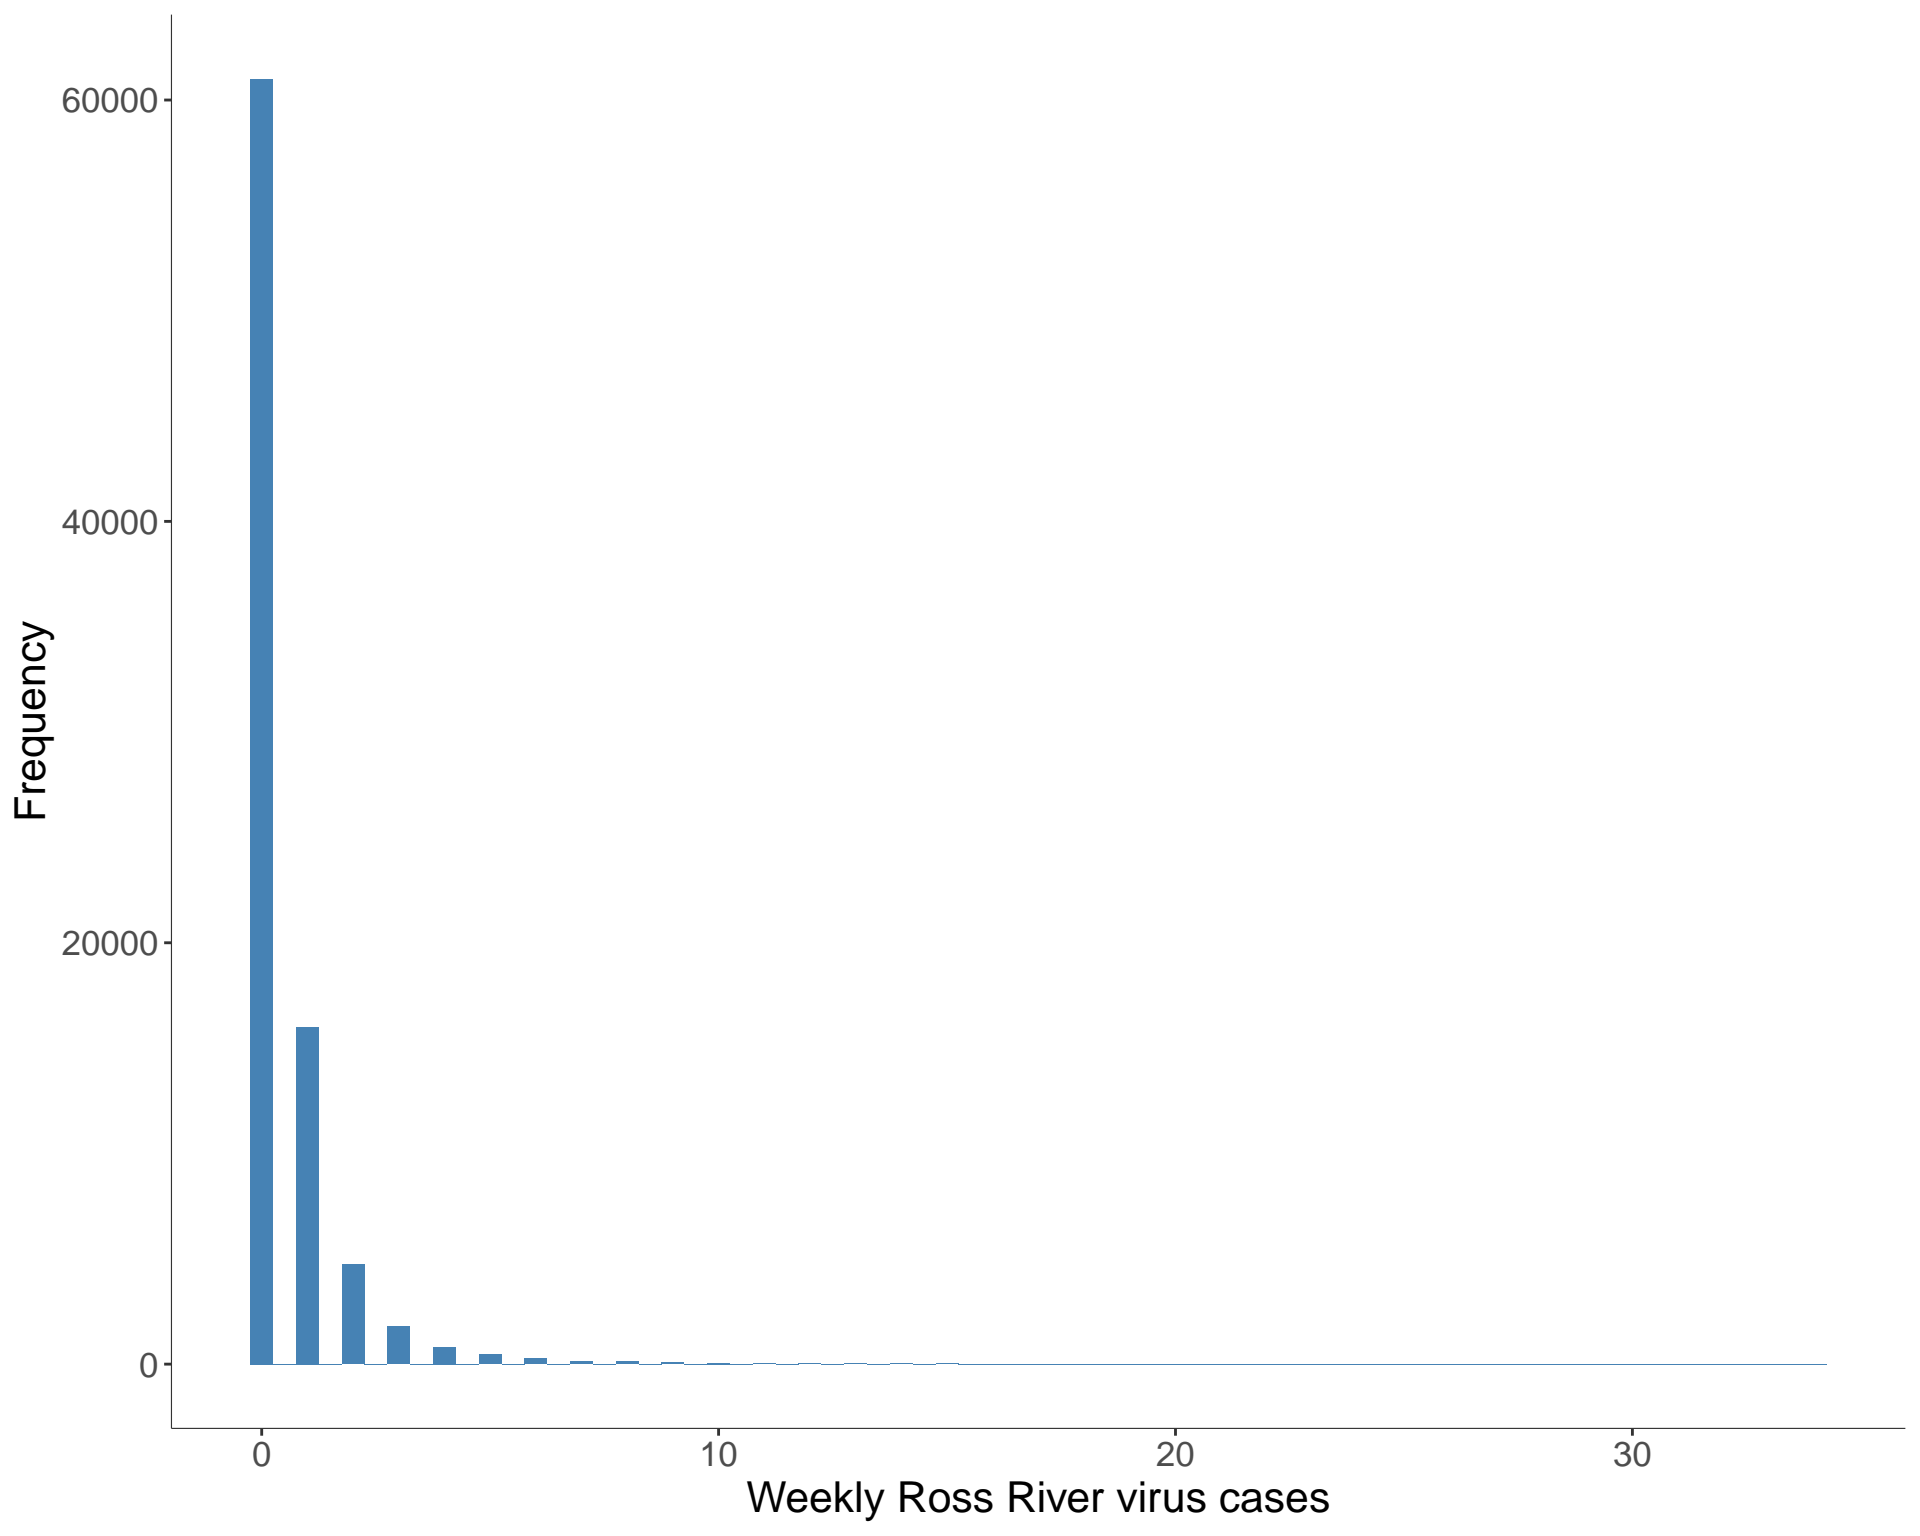

Supplement: Figure_S1_Freq_Revised.pdf [file Figure_S1_Freq_Revised.pdf]
